# Supplementary material
Source: PubMed Central journal article supplement (PMC4020915)
Supplement: NIHMS208210-supplement-1_si_001.pdf [file NIHMS208210-supplement-1_si_001.pdf]

**Supporting Information**  
**(Experimental detail, Chart S1, Table S1, and Figures S1 – S5)**

**Monooxo Molybdenum(VI) Complexes Possessing Olefinic Dithiolene Ligands: Probing Mo–S Covalency Contributions to Electron Transfer in DMSO Reductase Family Molybdoenzymes**

Hideki Sugimoto,<sup>\*†</sup> Susumu Tatemoto,<sup>†</sup> Koichiro Suyama,<sup>‡</sup> Hiroyuki Miyake,<sup>‡</sup> Regina P. Mtei,<sup>‡</sup> Shinobu Itoh,<sup>\*†</sup> and Martin L. Kirk,<sup>\*‡</sup>

<sup>†</sup> Department of Material and Life Science, Division of Advanced Science and Biotechnology, Graduate School of Engineering, Osaka University, 2-1 Yamadaoka, Suita, Osaka 565-0871, Japan,

<sup>‡</sup> Department of Chemistry, Graduate School of Science, Osaka City University, Sumiyoshi-ku, Osaka, 558-8585, Japan,

<sup>‡</sup> Department of Chemistry and Chemical Biology, The University of New Mexico, MSC03 2060, 1 University of New Mexico, Albuquerque, New Mexico 87131-0001

\*Corresponding author. email: sugimoto@mls.eng.osaka-u.ac.jp,  
shinobu@mls.eng.osaka-u.ac.jp, mkirk@unm.edu

## Experimental Section

**General.** All reagents and solvents were used as received unless otherwise noted. All reactions were carried out under argon in a Schlenk tube or a Miwa DB0-1KP glovebox.  $(\text{Et}_4\text{N})_2[\text{MoO}(\text{S}_2\text{C}_2(\text{COOMe})_2)_2]$  was prepared according to the literature.<sup>1</sup>

### Synthesis and Characterization of Complexes.

$(\text{Et}_4\text{N})[\text{Mo}^{\text{IV}}(\text{OSiBuPh}_2)(\text{S}_2\text{C}_2(\text{COOMe})_2)_2]$  ( $\mathbf{1}^{\text{OSiBuPh}_2}$ ). To 8 mL of an acetonitrile solution containing  $(\text{Et}_4\text{N})_2[\text{MoO}(\text{S}_2\text{C}_2(\text{COOMe})_2)_2]$  (200.0 mg, 0.255 mmol),  ${}^t\text{BuPh}_2\text{SiCl}$  (144.8 mL, 0.566 mmol) was added to give an orange solution. The solvent was removed under reduced pressure to provide a yellow powder. The powder was collected by filtration and dried in vacuo. Yield 221.3 mg (97%). Anal. Calcd. for  $\text{C}_{36}\text{H}_{51}\text{MoNO}_9\text{S}_4\text{Si}$  (MW = 894.09): C 48.36; H 5.75; N 1.57. Found: C 48.33; H 5.72; N 1.61%.  ${}^1\text{H}$  NMR ( $\text{CD}_3\text{CN}$ , anionic part):  $\delta$  0.80 (s, 9H), 3.82 (s, 12H), 7.28-7.43 (m, 10H). UV-vis spectrum ( $\text{CH}_3\text{CN}$ ):  $\lambda_{\text{max}} = 331$  nm ( $\epsilon = 17600 \text{ M}^{-1} \text{ cm}^{-1}$ ), 416 (sh), 517 (550), 659 (360). ESI-MS ( $\text{CH}_3\text{CN}$ ): 765  $[\text{M}]^-$ . Cyclic voltammogram (CV,  $\text{CH}_3\text{CN}$ ): +0.76 V vs. SCE (irreversible), -1.44 V (reversible). IR (KBr):  $\nu$  505 (w), 710 (w), 915 (s,  $\nu_{\text{SiO}}$ ), 1014 (w), 1075 (w), 1112 (w), 1237 (vs), 1393 (w), 1431 (m), 1543 (m), 1705 (s), 1726 (s)  $\text{cm}^{-1}$ .

$(\text{Et}_4\text{N})[\text{Mo}^{\text{IV}}(\text{OSiPr}_3)(\text{S}_2\text{C}_2(\text{COOMe})_2)_2]$  ( $\mathbf{1}^{\text{OSiPr}_3}$ ). This complex was prepared by a similar method as for the preparation of  $\mathbf{1}^{\text{OSiBuPh}_2}$  except that  ${}^i\text{Pr}_3\text{SiCl}$  was used instead of  ${}^t\text{BuPh}_2\text{SiCl}$ .  ${}^1\text{H}$  NMR ( $\text{CD}_3\text{CN}$ , anionic part):  $\delta$  0.82 (d, 18H), 1.098 (hep, 3H), 73.791 (s, 12H). UV-vis spectrum ( $\text{CH}_3\text{CN}$ ):  $\lambda_{\text{max}} = 362$  nm ( $\epsilon = 20269 \text{ M}^{-1} \text{ cm}^{-1}$ ), 412 (1634), 507 (363). ESI-MS ( $\text{CH}_3\text{CN}$ ): 683  $[\text{M}]^-$ . This complex was very hygroscopic for characterization by elemental analysis, IR, and CV.

$(\text{Et}_4\text{N})[\text{Mo}^{\text{VI}}\text{O}(\text{OSiBuPh}_2)(\text{S}_2\text{C}_2(\text{COOMe})_2)_2]$  ( $\mathbf{2}^{\text{OSiBuPh}_2}$ ). An acetone solution (1 mL) of  $\text{Me}_3\text{NO}$  (5.2 mg, 0.069 mmol) was added to a THF solution (6 mL) of  $\mathbf{1}^{\text{OSiBuPh}_2}$  (50.7 mg, 0.057 mmol). The resultant purple solution was concentrated to  $\sim 3$  mL. After any undissolved solid was removed by filtration, the solution was concentrated again to  $\sim 1$

mL. An addition of 6 mL of hexane to the solution obtained yielded a purple powder, which was collected by filtration and dried in vacuo. Yield 44.6 mg (86%). Anal. Calcd. for  $C_{36}H_{51}MoNO_{10}S_4Si$  (MW = 910.09): C 47.51; H 5.65; N 1.54. Found: C 47.17; H 5.79; N 1.68%.  $^1H$  NMR ( $CD_3CN$ , anionic part):  $\delta$  1.03 (s, 9H), 3.71 (s, 12H), 7.32-7.42 (m, 6H), 7.77 (m, 4H). UV-vis spectrum ( $CH_3CN$ ):  $\lambda_{max}$  = 320 nm (sh), 426 ( $\epsilon$  = 2800  $M^{-1} cm^{-1}$ ), 563 (3140), 729 (1310). ESI-MS ( $CH_3CN$ ): 781  $[M]^-$ . Cyclic voltammogram (CV,  $CH_3CN$ ): -0.46 V vs. SCE (reversible). IR (KBr):  $\nu$  505 (m), 613 (w), 706 (w), 876 (s,  $\nu_{MoO}$ ), 916 (s,  $\nu_{SiO}$ ), 1027 (m), 1240 (vs), 1393 (w), 1429 (m), 1460 (m), 1543 (w), 1702 (s), 1727 (s)  $cm^{-1}$ .

**(Et<sub>4</sub>N)[Mo<sup>VI</sup>O(OSiPr<sub>3</sub>)(S<sub>2</sub>C<sub>2</sub>(COOMe)<sub>2</sub>)<sub>2</sub>] (2<sup>OSiPr<sub>3</sub></sup>).** This complex was prepared by a similar method as for the preparation of 2<sup>OSiBuPh<sub>2</sub></sup> except that 1<sup>OSiPr<sub>3</sub></sup> (0.059 mmol) was used instead of 1<sup>OSiBuPh<sub>2</sub></sup>. Yield 31.4 mg (64%). Anal. Calcd. for  $C_{29}H_{53}MoNO_{10}S_4Si$  (MW = 910.09): C 42.06; H 6.45; N 1.69. Found: C 42.12; H 5.79; N 1.80%.  $^1H$  NMR ( $CD_3CN$ , anionic part):  $\delta$  1.08 (d, 18H), 1.12-1.17 (m, 3H), 3.72 (s, 12H). UV-vis spectrum ( $CH_3CN$ ):  $\lambda_{max}$  = 350 nm (sh), 430 (sh), 559 ( $\epsilon$  = 2828  $M^{-1} cm^{-1}$ ), 742 (948). IR (KBr):  $\nu$  681 (w), 767 (w), 868 (s,  $\nu_{MoO}$ ), 909 (vs,  $\nu_{SiO}$ ), 1000 (w), 1024 (m), 1241 (vs), 1394 (w), 1432 (m), 1463 (m), 1538 (w), 1699 (s), 1727 (s)  $cm^{-1}$ .

**Physical Measurements.** FT-IR spectra were recorded with a Perkin Elmer Spectrum One. Resonance Raman (rR) scattering was excited at 632.8 nm with a He-Ne ion laser (Jasco NRS-1000). Raman shifts were calibrated with inden. UV-vis spectra were recorded on a Hewlett Packard 8453 photo diode array spectrophotometer. ESI-MS (electrospray ionization mass spectra) measurements were performed on a PE SCIEX API 150EX

**X-ray Crystallography.** Single crystals of 1<sup>OSiBuPh<sub>2</sub></sup> and 2<sup>OSiPr<sub>3</sub></sup> were obtained by recrystallization from their acetonitrile/ether solutions. Each single crystal was mounted on a glass fiber with traces of viscous oil. The X-ray data were collected

with graphite-monochromated Mo-K $\alpha$  radiation on a Rigaku/MSM Mercury CCD diffractometer at  $-160$  or  $-150$  °C. The structures were solved by direct methods (SIR-97)<sup>2</sup> and expanded using DIRDIF 99.<sup>3</sup> The atoms except hydrogen atoms were refined anisotropically by full-matrix least squares on  $F^2$ . The hydrogen atoms in all structures were attached at idealized positions on carbon atoms and were not refined. All structures converted in the final stages of refinement showed no movement in atom positions. Calculations were performed using Single Crystal Structure Analysis Software, Ver. 3.6.0.<sup>4</sup> Crystallographic parameters of the three complexes are summarized in Table S1.

## References

- (1) Coucouvanis, D.; Hadjikyriacou, A.; Toupadakis, A.; Koo, S. M.; Ileperuma, O.; Draganjac, M.; Salifoglou, A. *Inorg. Chem.* **1991**, *30*, 754.
- (2) Altomare, A.; Burla, M.; Camalli, M.; Cascarano, G.; Giacovazzo, C.; Guagliardi, A.; Moliterni, A.; Polidori, G.; Spagna, R. *J. Appl. Cryst.* **1999**, *32*, 115-119.
- (3) Beurskens, P.T.; Admiraal, G.; Beurskens, G.; Bosman, W.P.; de Gelder, R.; Israel, R.; Smits, J.M.M.(1999). The DIRDIF-99 program system, Technical Report of the Crystallography Laboratory, University of Nijmegen, The Netherlands.
- (4) Rigaku/MSM, 9009 New Trails Drive, The Woodlands, TX, USA 77381-5209.

## Complete Gaussian Reference.

- (5) Frisch, M. J.; G. W. T., Schlegel, H. B.; Scuseria, G. E.; Robb, M. A.; Cheeseman, J. R.; Montgomery, J. A.; Vreven, Jr., T.; Kudin, K. N.; Burant, J. C.; Millam, J. M.; Iyengar, S. S.; Tomasi, J.; Barone, V.; Mennucci, B.; Cossi, M.; Scalmani, G.; Rega, N.; Petersson, G. A.; Nakatsuji, H.; Hada, M.; Ehara, M.; Toyota, K.; Fukuda, R.; Hasegawa, J.; Ishida, M.; Nakajima, T.; Honda, Y.; Kitao, O.; Nakai, H.; Klene, M.; Li, X.; Knox, J. E.; Hratchian, H. P.; Cross, J. B.; Bakken, V.; Adamo, C.; Jaramillo, J.; Gomperts, R.; Stratmann, R. E.; Yazyev, O.; Austin, A. J.; Cammi, R.; Pomelli, C.; Ochterski, J. W.; Ayala, P. Y.; Morokuma, K.; Voth, G. A.; Salvador, P.; Dannenberg, J. J.; Zakrzewski, V. G.; Dapprich, S.; Daniels, A. D.; Strain, M. C.; Farkas, O.; Malick, D. K.; Rabuck, A.

D.; Raghavachari, K.; Foresman, J. B.; Ortiz, J. V.; Cui, Q.; Baboul, A. G.; Clifford, S.; Cioslowski, J.; Stefanov, B. B.; Liu, G.; Liashenko, A.; Piskorz, P.; Komaromi, I.; Martin, R. L.; Fox, D. J.; Keith, T.; Al-Laham, M. A.; Peng, C. Y.; Nanayakkara, A.; Challacombe, M.; Gill, P. M. W.; Johnson, B.; Chen, W.; Wong, M. W.; Gonzalez, C.; Pople, J. A. *Gaussian 03, Revision C.02*, Gaussian, Inc.: Wallingford CT, 2004.

**Chart S1.** Designation and Abbreviation of Complex Structures

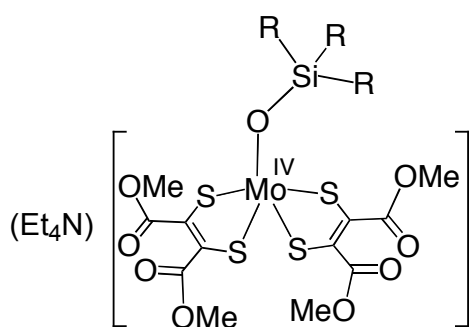

R = <sup>i</sup>Pr<sup>i</sup>Pr<sup>i</sup>Pr     **1<sup>OSiPr3</sup>**  
 R = <sup>t</sup>BuPhPh     **1<sup>OSiBuPh2</sup>**

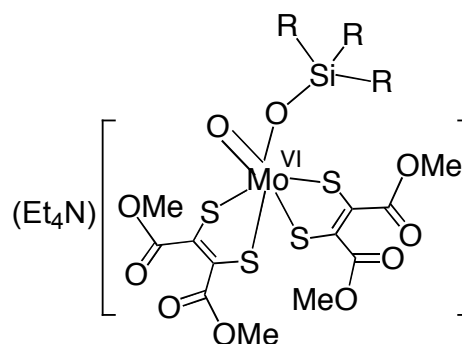

R = <sup>i</sup>Pr<sup>i</sup>Pr<sup>i</sup>Pr     **2<sup>OSiPr3</sup>**  
 R = <sup>t</sup>BuPhPh     **2<sup>OSiBuPh2</sup>**

**Table S1.** Crystallographic data of  $(\text{Et}_4\text{N})[\text{Mo}^{\text{IV}}(\text{OSi}^i\text{BuPh}_2)(\text{S}_2\text{C}_2(\text{COOMe})_2)_2]$  (**1**<sup>OSiBuPh2</sup>) and  $(\text{Et}_4\text{N})[\text{Mo}^{\text{VI}}\text{O}(\text{OSi}^i\text{Pr}_3)(\text{S}_2\text{C}_2(\text{COOMe})_2)_2]$  (**2**<sup>OSiPr3</sup>)

|                                                              | <b>1</b> <sup>OSiBuPh2</sup>                                 | <b>2</b> <sup>OSiPr3</sup>                                      |
|--------------------------------------------------------------|--------------------------------------------------------------|-----------------------------------------------------------------|
| formula                                                      | $\text{C}_{36}\text{H}_{51}\text{MoNO}_9\text{S}_4\text{Si}$ | $\text{C}_{29}\text{H}_{53}\text{MoNO}_{10}\text{S}_4\text{Si}$ |
| fw                                                           | 894.07                                                       | 828.00                                                          |
| size (mm)                                                    | $0.30 \times 0.20 \times 0.20$                               | $0.38 \times 0.10 \times 0.05$                                  |
| temperature (K)                                              | 100                                                          | 110                                                             |
| crystal system                                               | orthorhombic                                                 | triclinic                                                       |
| space group                                                  | $P2_12_12_1$ (no. 19)                                        | $P-1$                                                           |
| <i>Z</i>                                                     | 4                                                            | 2                                                               |
| <i>a</i> , Å                                                 | 10.4641(16)                                                  | 9.394                                                           |
| <i>b</i> , Å                                                 | 18.324(3)                                                    | 11.937(6)                                                       |
| <i>c</i> , Å                                                 | 22.244(4)                                                    | 18.151(10)                                                      |
| $\alpha$ , deg                                               | 90                                                           | 97.052(4)                                                       |
| $\beta$ , deg                                                | 90                                                           | 95.998(7)                                                       |
| $\gamma$ , deg                                               | 90                                                           | 100.549(6)                                                      |
| <i>V</i> , Å <sup>3</sup>                                    | 4265.2(12)                                                   | 1969.0(18)                                                      |
| $\mu$ , cm <sup>-1</sup>                                     | 5.80                                                         | 6.21                                                            |
| GOF                                                          | 0.864                                                        | 1.225                                                           |
| <i>R</i> <sub>1</sub> % ( <i>I</i> > 2.0 $\sigma$ <i>I</i> ) | 3.16                                                         | 5.27                                                            |
| <i>wR</i> <sub>2</sub> % (all data)                          | 8.71                                                         | 13.40                                                           |

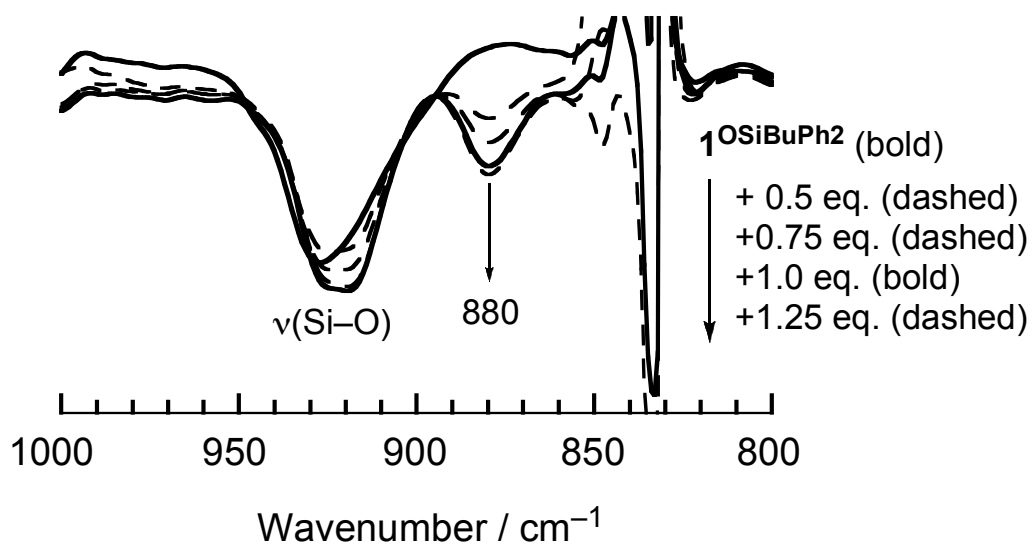

**Figure S1.** Titration of  $(\text{Et}_4\text{N})[\text{MoO}(\text{OSi}^t\text{BuPh}_2)(\text{S}_2\text{C}_2(\text{COOMe})_2)_2]$  (**1 OSiBuPh<sub>2</sub>**) with  $\text{Me}_3\text{NO}$  in  $\text{CD}_3\text{CN}$ .



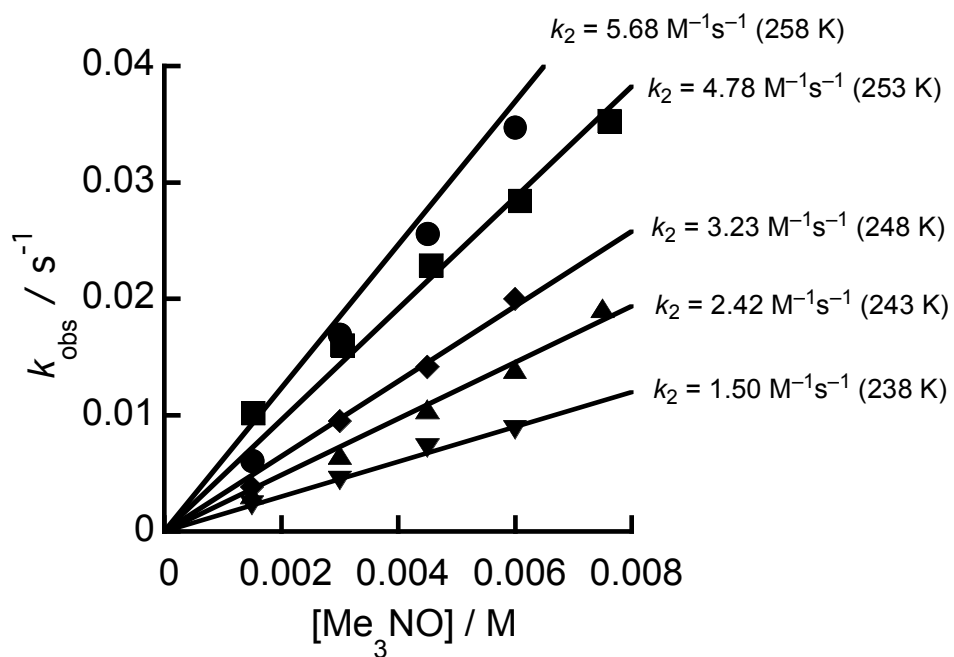

**Figure S2.** Temperature dependent plots of  $k_{\text{obs}}$  vs.  $[\text{Me}_3\text{NO}]$  in the reaction of  $(\text{Et}_4\text{N})[\text{Mo}^{\text{VI}}\text{O}(\text{OSi}^t\text{BuPh}_2)(\text{S}_2\text{C}_2(\text{COOMe})_2)_2]$  with  $\text{Me}_3\text{NO}$  in  $\text{CH}_3\text{CN}$ .

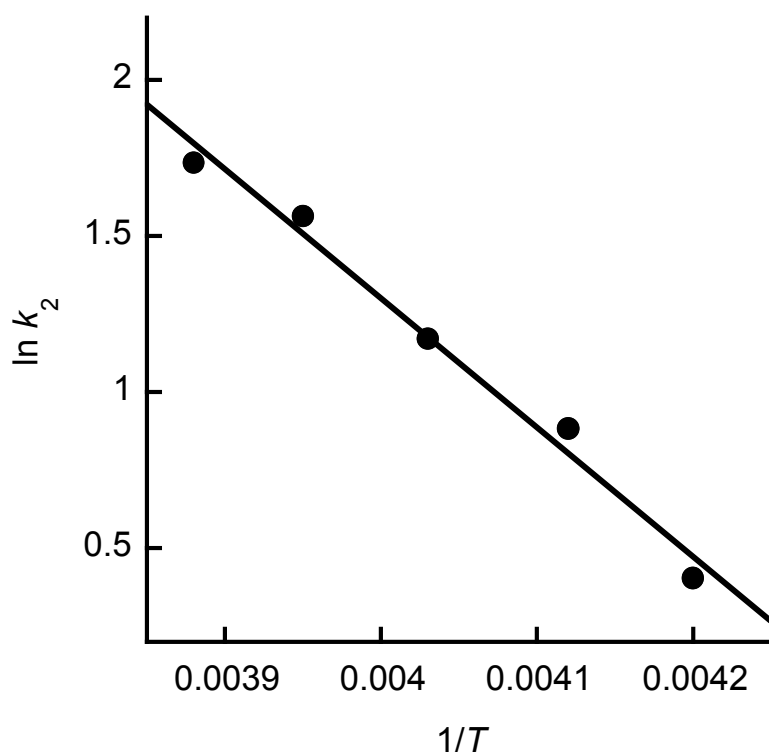

**Figure S3.** Arrhenius plot for the reaction of  $(\text{Et}_4\text{N})[\text{Mo}^{\text{VI}}\text{O}(\text{OSi}^t\text{BuPh}_2)(\text{S}_2\text{C}_2(\text{COOMe})_2)_2]$  with  $\text{Me}_3\text{NO}$  in  $\text{CH}_3\text{CN}$ .

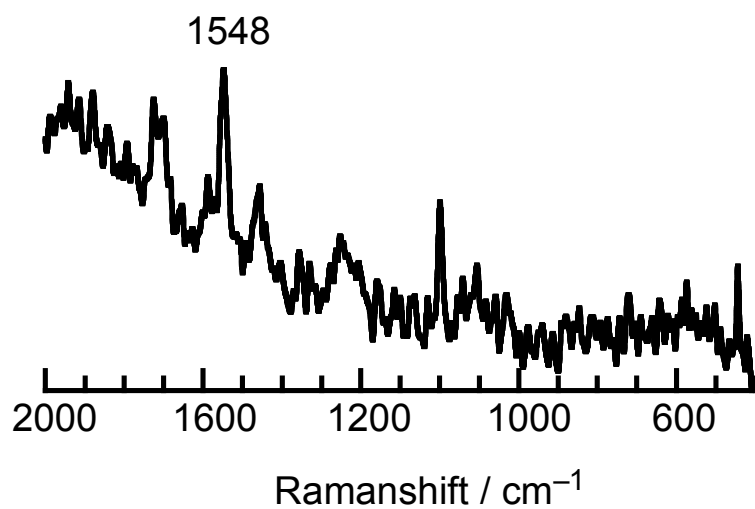

**Figure S4.** FT Raman spectrum of  
(Et<sub>4</sub>N)[Mo<sup>IV</sup>(OSi<sup>t</sup>BuPh<sub>2</sub>)(S<sub>2</sub>C<sub>2</sub>(COOMe)<sub>2</sub>)<sub>2</sub>] (**1<sup>OSiBuPh2</sup>**)

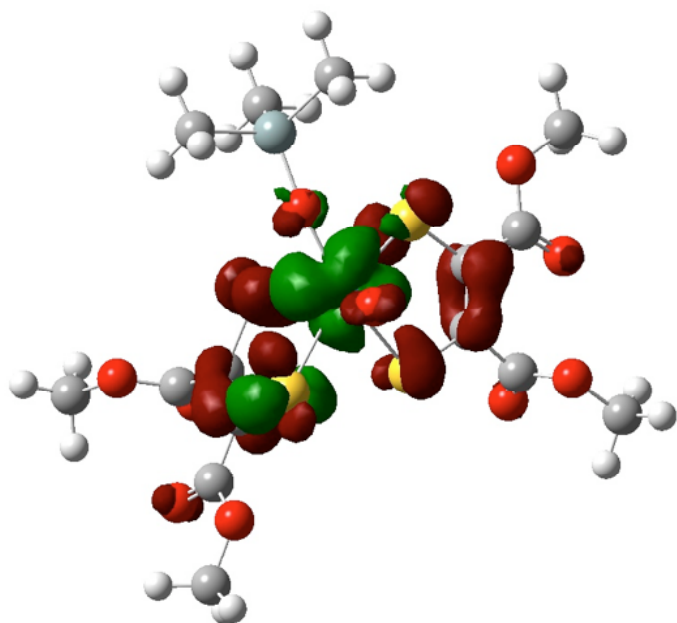

**Figure S5.** EDDM for Band 2 in Figure 4.
